# Supplementary material
Source: PubMed Central journal article supplement (PMC1634766)
Supplement: rspb20063518s04.pdf [file rspb20063518s04.pdf]

**Supplementary data (Tables S1, S2 and S3)**

595 **Table S1:** Variables and model parameters. Values are the same for the example involving the equilibrium and the cyclic ecological dynamics unless two are given (values for the cyclic dynamics are then included in parentheses).

**Table S2:** Individual-level equations used in the simulations. These equations apply to individuals older than 1 year for the equilibrium dynamics and to all individuals for the cyclic ecological dynamics. Population-level equations are presented in Table S3 (see also Persson  
600 *et al.* (1998) and de Roos & Persson (2001)).

**Table S3:** Population-level equations used in the simulations of the ecological dynamics. Notice that in case of the Ricker stock-recruitment relationship, newborn individuals are assigned reversible and irreversible mass values at birth that correspond to the length at  
605 which they are recruited to the population ( $l=50\text{mm}$ ). This newborn cohort (with index 0) is not taking part in the population dynamics until reaching age 1 and is hence neither harvested nor included into the resource foraging of the total population (summation term in the resource dynamic equation). Without a stock-recruitment relationship the newborn cohort follows the dynamics as prescribed by the within-season equations for all cohorts and is also  
610 harvested and included into the population foraging rate. In simulations based on the quantitative genetics approach, the newborn cohort is subdivided into a number of different sub-cohorts, which are characterized by their respective maturation sizes  $l_{mat}$ . Population dynamics follow the same systems of equations as in the absence of any phenotypic variability; the population is now made up by a larger number of smaller sub-cohorts with  
615 their own body sizes ( $x$  and  $y$ ) and maturation size parameters.

**References**

- Persson, L., Leonardsson, K., de Roos, A. M., Gyllenberg, M. & Christensen, B. 1998 Ontogenetic scaling of foraging rates and the dynamics of a size-structured consumer-resource model. *Theor. Pop. Biol.* **54**, 270-293.
- de Roos, A. M. & Persson, L. 2001 Physiologically structured models - from versatile technique to ecological theory. *Oikos* **94**, 51-71.

**Table S1**

| subject           | symbol    | value                                     | unit                                  | interpretation                               |
|-------------------|-----------|-------------------------------------------|---------------------------------------|----------------------------------------------|
| Consumer          | $N$       | -                                         | #                                     | cohort size                                  |
|                   | $x$       | -                                         | g                                     | irreversible mass                            |
|                   | $y$       | -                                         | g                                     | reversible mass                              |
| Seasonality       | $Y$       | 90 (120)                                  | days                                  | growth season                                |
| Resource          | $R$       | -                                         | $\text{g L}^{-1}$                     | resource density                             |
|                   | $r$       | 0.1                                       | $\text{d}^{-1}$                       | population growth rate                       |
|                   | $K$       | 0.003 (0.01)                              | $\text{g L}^{-1}$                     | carrying capacity                            |
|                   | $V$       | $10^9$                                    | L                                     | habitat volume                               |
| Consumer ontogeny | $w_b$     | $1.4 \cdot 10^{-3}$                       | g                                     | total egg mass                               |
|                   | $l_{exp}$ | 0.29                                      | -                                     | allometric exponent                          |
|                   | $l_c$     | 58.9                                      | $\text{mm g}^{-l_{exp}}$              | allometric scalar                            |
|                   | $l_{mat}$ | varied                                    | mm                                    | maturation size                              |
|                   | $q_j$     | 0.74                                      | -                                     | juvenile max. condition                      |
|                   | $q_a$     | 1.0                                       | -                                     | adult max. condition                         |
|                   | $k_r$     | 0.5                                       | -                                     | gonad-egg conversion efficiency              |
|                   |           |                                           |                                       |                                              |
| Planktivory       | $\alpha$  | 1.0 (0.6)                                 | -                                     | allometric exponent                          |
|                   | $A_{max}$ | $*1.0 \cdot 10^5$<br>( $1.5 \cdot 10^5$ ) | $\text{L d}^{-1}$                     | maximum attack rate<br>(* = at 95 mm length) |
|                   | $x_0$     | 28.7                                      | g                                     | optimal foraging size<br>(irreversible mass) |
| Handling          | $\xi_1$   | 3.8                                       | $\text{d g}^{-(1+\xi_2)}$             | allometric scalar                            |
|                   | $\xi_2$   | -0.81                                     | -                                     | allometric exponent                          |
| Metabolism        | $\rho_1$  | 0.033                                     | $\text{g}^{(1+\rho_2)} \text{d}^{-1}$ | allometric scalar                            |
|                   | $\rho_2$  | 0.77                                      | -                                     | allometric exponent                          |
|                   | $k_e$     | 0.61                                      | -                                     | conversion coefficient                       |
| Natural mortality | $\mu_0$   | 0.014 (0.02)                              | $\text{d}^{-1}$                       | background mortality rate                    |
|                   | $q_s$     | 0.2                                       | -                                     | starvation condition threshold               |
|                   | $s$       | 0.2                                       | $\text{d}^{-1}$                       | starvation mortality threshold               |

**Table S2**

| Subject                                                               | Equation                                                                                                                                                                                                                                  |
|-----------------------------------------------------------------------|-------------------------------------------------------------------------------------------------------------------------------------------------------------------------------------------------------------------------------------------|
| Body length                                                           | $L(x) = l_c x^{l_{\text{exp}}}$                                                                                                                                                                                                           |
| Attack rate                                                           | $A(x) = A_{\text{max}} \left( \frac{x}{x_0} \exp\left(1 - \frac{x}{x_0}\right) \right)^\alpha$                                                                                                                                            |
| Handling time                                                         | $H(x) = \xi_1 x^{\xi_2}$                                                                                                                                                                                                                  |
| Food intake rate                                                      | $I(x, R) = \frac{A(x)R}{1 + A(x)H(x)R}$                                                                                                                                                                                                   |
| Assimilated energy                                                    | $E_a(x, R) = k_e I(x, R)$                                                                                                                                                                                                                 |
| Maintenance requirements                                              | $E_m(x, y) = \rho_1 (x + y)^{\rho_2}$                                                                                                                                                                                                     |
| Energy balance                                                        | $E_g(x, y, R) = E_a(x, R) - E_m(x, y)$                                                                                                                                                                                                    |
| Fraction of net energy $E_g$ allocated to growth in irreversible mass | $\kappa(x, y, R) = \begin{cases} \frac{y}{(1+q_j)q_j x} & \text{if } L(x) \leq l_{\text{mat}} \text{ and } E_g > 0 \\ \frac{y}{(1+q_a)q_a x} & \text{if } L(x) > l_{\text{mat}} \text{ and } E_g > 0 \\ 0 & \text{otherwise} \end{cases}$ |
| Starvation mortality rate                                             | $\mu_s(x, y) = \begin{cases} s \left( q_s \frac{x}{y} - 1 \right) & \text{if } \frac{y}{x} \leq q_s \\ 0 & \text{if } \frac{y}{x} > q_s \end{cases}$                                                                                      |
| Total natural mortality rate                                          | $\mu(x, y) = \mu_0 + \mu_s(x, y)$                                                                                                                                                                                                         |
| Harvested fraction of cohort                                          | $h(x) = \frac{h_{\text{max}}}{1 + e^{0.15(T-L(x))}}$                                                                                                                                                                                      |
| Fecundity (eggs spawned)                                              | $F(x, y) = \begin{cases} k_r (y - q_j x) / w_b & \text{if } L(x) > l_{\text{mat}} \text{ and } y > q_j x \\ 0 & \text{otherwise} \end{cases}$                                                                                             |

**Table S3**

| Subject                                                                            | Equation                                                                                                                                                                                    |
|------------------------------------------------------------------------------------|---------------------------------------------------------------------------------------------------------------------------------------------------------------------------------------------|
| Resource dynamics                                                                  | $\frac{dR}{dt} = r(K - R) - \sum_i I(x_i, R) \frac{N_i}{V}$                                                                                                                                 |
| Within-season dynamics<br>of (sub-)cohorts                                         | $\begin{cases} \frac{dN_i}{dt} = -\mu(x_i, y_i)N_i \\ \frac{dx_i}{dt} = \kappa_i(x_i, y_i, R)E_g(x_i, y_i, R) \\ \frac{dy_i}{dt} = (1 - \kappa_i(x_i, y_i, R))E_g(x_i, y_i, R) \end{cases}$ |
| Reproduction (Ricker<br>stock-recruitment<br>relationship)                         | $\begin{cases} N_0 = 0.01Ee^{-2 \cdot 10^{-9}E} \quad \text{with } E = \sum_i F(x_i, y_i)(1 - h(x_i))N_i \\ x_0 = 0.57 \\ y_0 = 0.42 \end{cases}$                                           |
| Reproduction (no stock-<br>recruitment relationship)                               | $\begin{cases} N_0 = \sum_i F(x_i, y_i)(1 - h(x_i))N_i \\ x_0 = \frac{1}{1 + q_j} w_b \\ y_0 = \frac{q_j}{1 + q_j} w_b \end{cases}$                                                         |
| Between-season changes<br>of older cohorts<br>(harvesting, aging,<br>reproduction) | $\begin{cases} N_{i+1} = (1 - h(x_i))N_i \\ x_{i+1} = x_i \\ y_{i+1} = \begin{cases} q_j x_i & \text{if } F(x_i, y_i) > 0 \\ y_i & \text{otherwise} \end{cases} \end{cases}$                |
